# Supplementary material
Source: PubMed Central journal article supplement (PMC6548320)

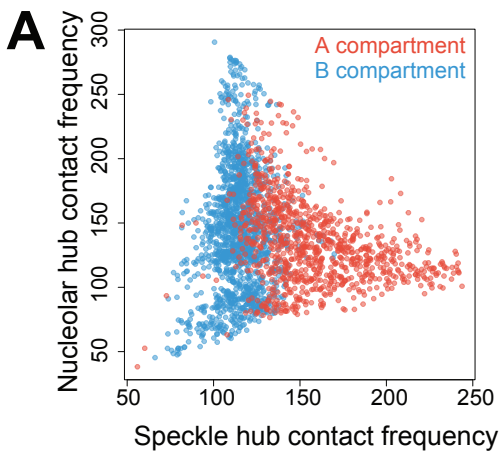

**B**

3D distances to nucleolus

| Region   | Number of Cells |
|----------|-----------------|
| Chr3-C   | 100             |
| Chr4-A   | 50              |
| Chr12-I  | 101             |
| Chr15-I  | 155             |
| Chr18-I  | 104             |
| Chr18-C1 | 50              |
| Chr18-C2 | 51              |
| Chr19-C  | 52              |
| Chr19-I  | 150             |

3D distances to nuclear speckle

| Region   | Number of Cells |
|----------|-----------------|
| Chr2-A   | 50              |
| Chr4-A   | 50              |
| Chr4-C   | 50              |
| Chr11-A  | 51              |
| Chr11-C  | 50              |
| Chr18-I  | 50              |
| Chr18-C1 | 50              |
| Chr18-C2 | 50              |
| Chr19-C  | 50              |

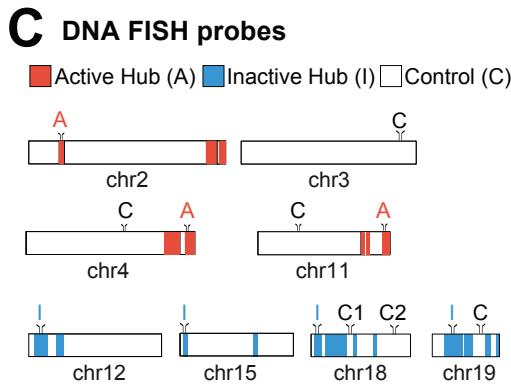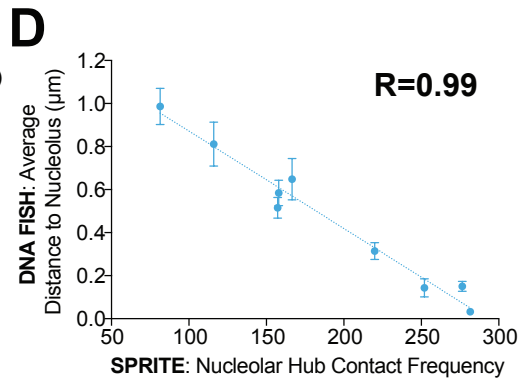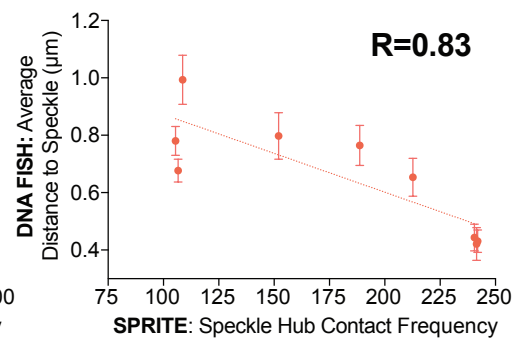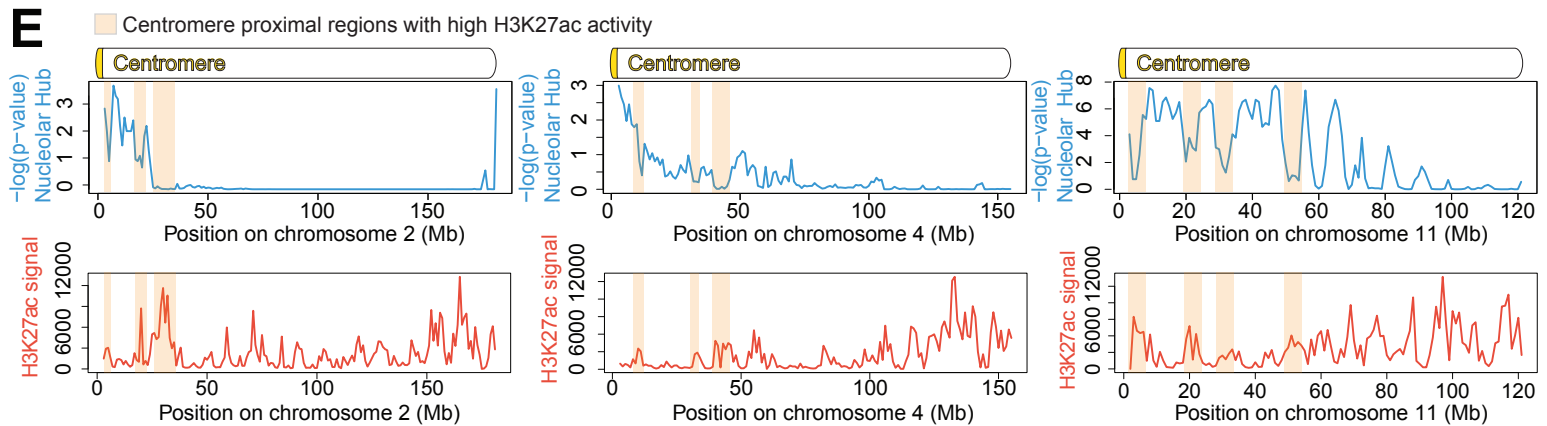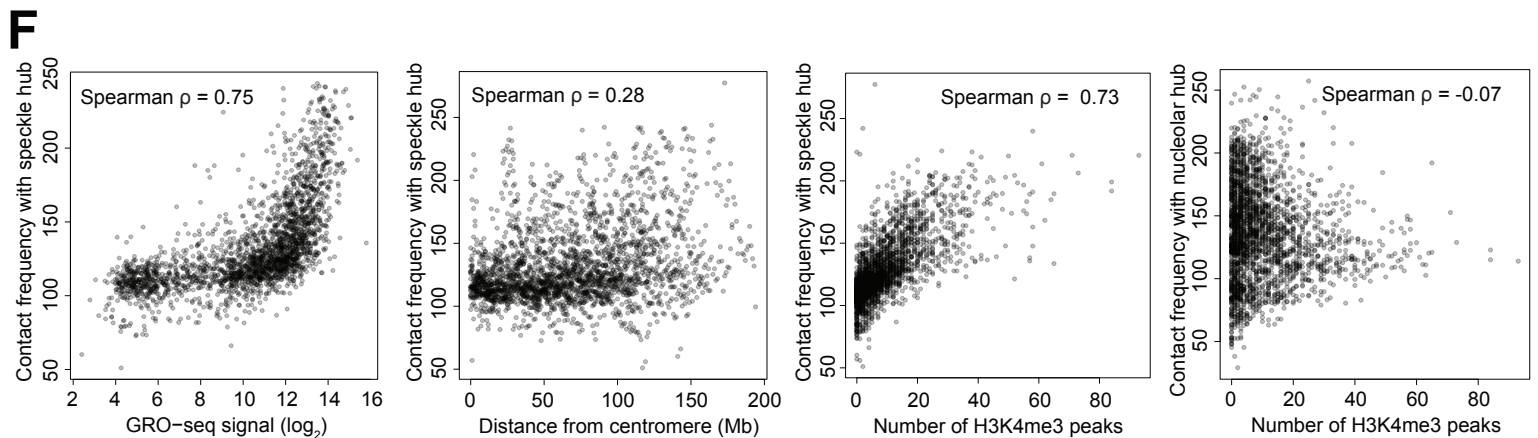

Supplement: NIHMS972930-supplement-6.pdf [file NIHMS972930-supplement-6.pdf]
