# Supplementary material
Source: PubMed Central journal article supplement (PMC6548320)

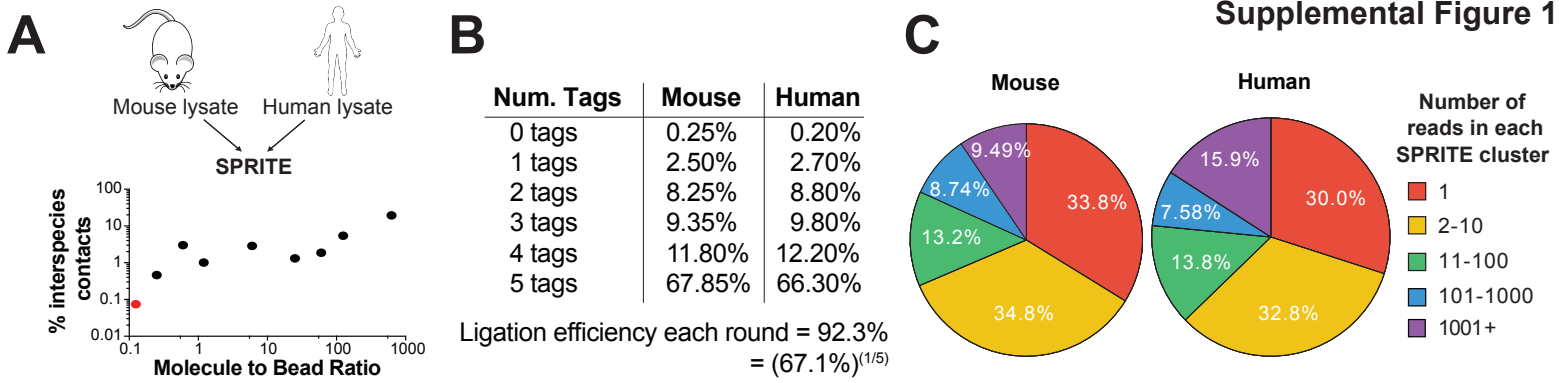

Mouse Embryonic Stem Cells

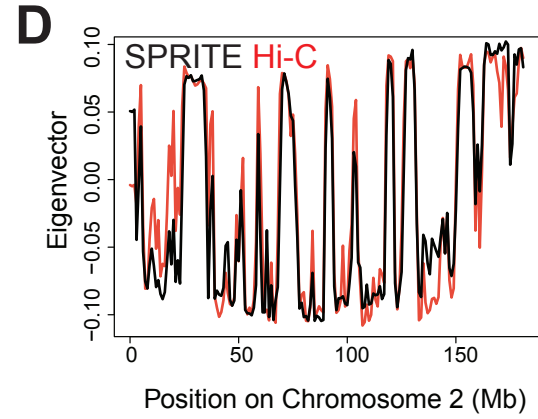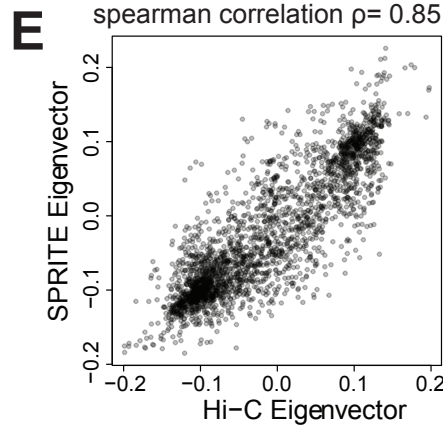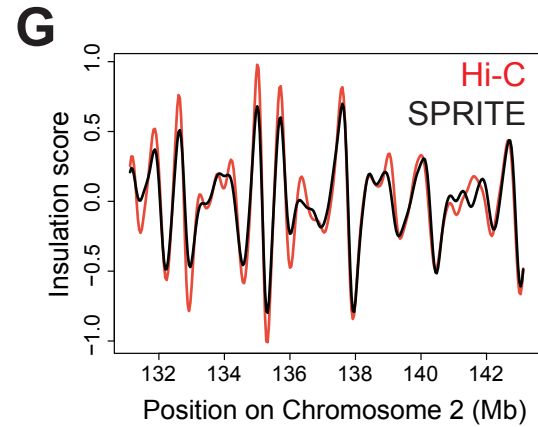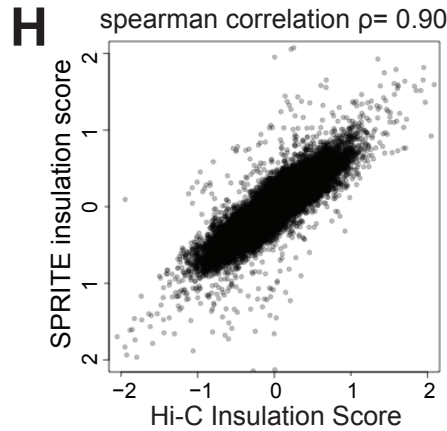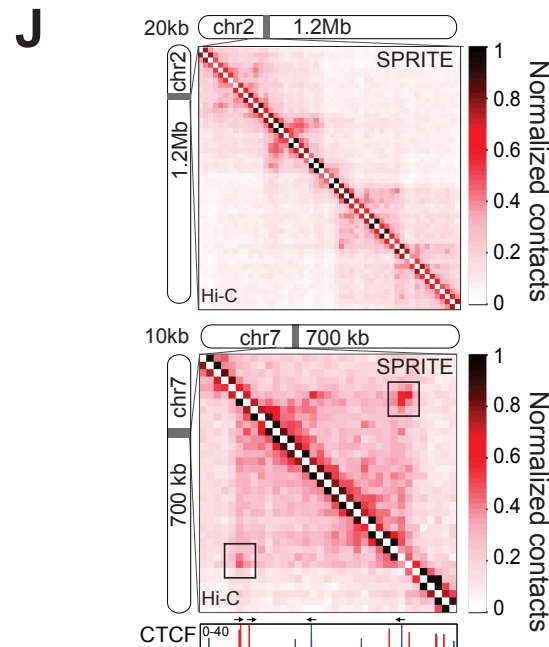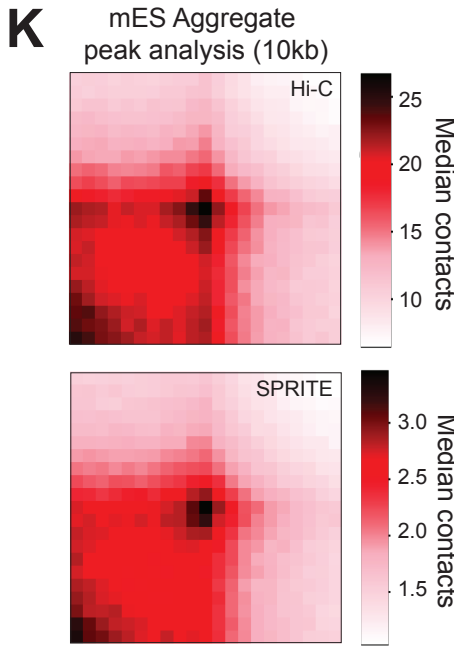

Human GM12878 Lymphoblast Cells

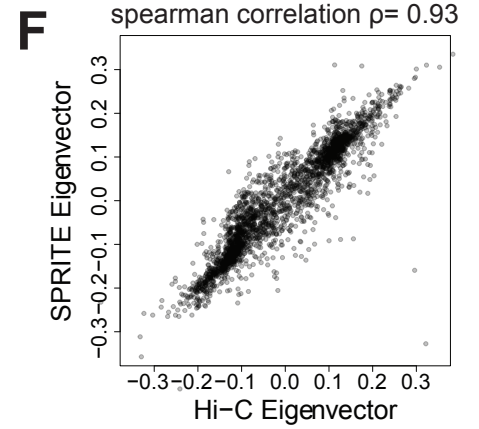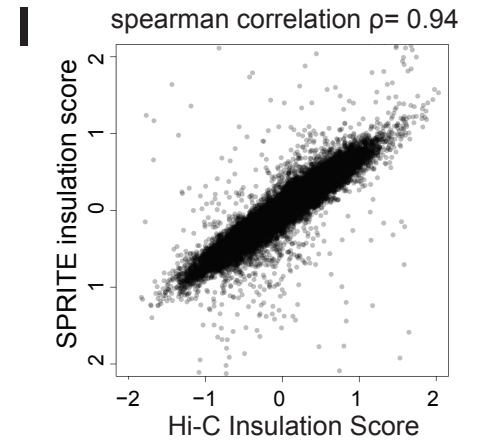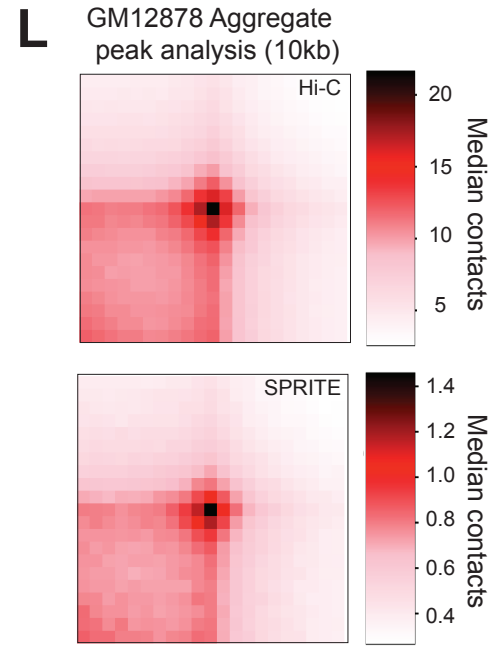

Supplement: NIHMS972930-supplement-1.pdf [file NIHMS972930-supplement-1.pdf]

## Supplemental Figure 2

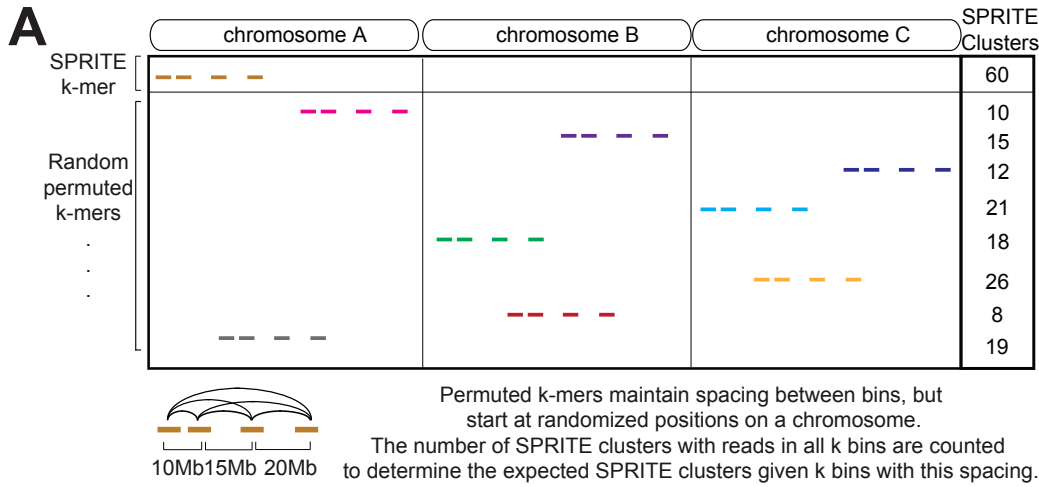

**B**

| k =      | All k-mers | Enriched |
|----------|------------|----------|
| Min      | 3          | 3        |
| Max      | 15         | 14       |
| Mode     | 4          | 5        |
| Mean     | 4.98       | 5.96     |
| Median   | 5          | 6        |
| Std. Dev | 1.36       | 1.58     |

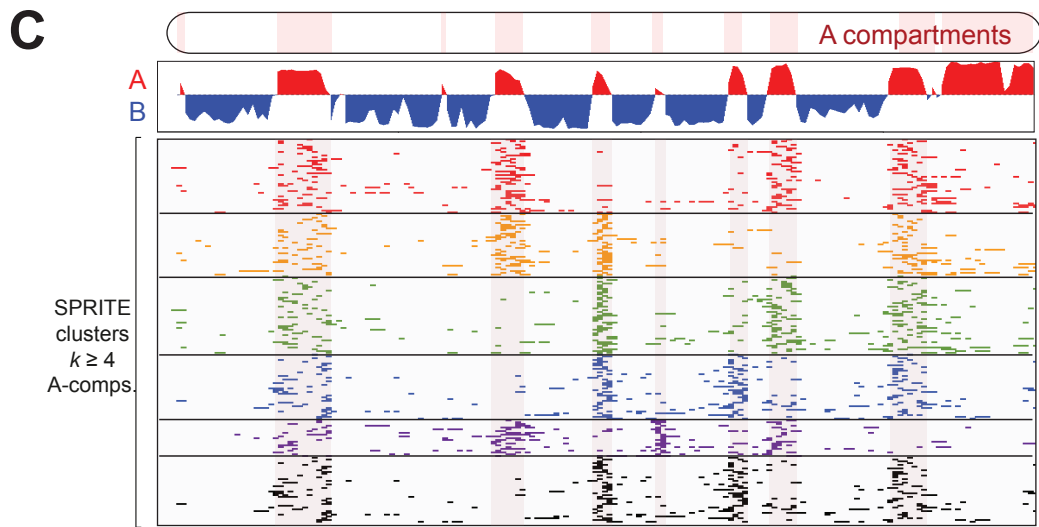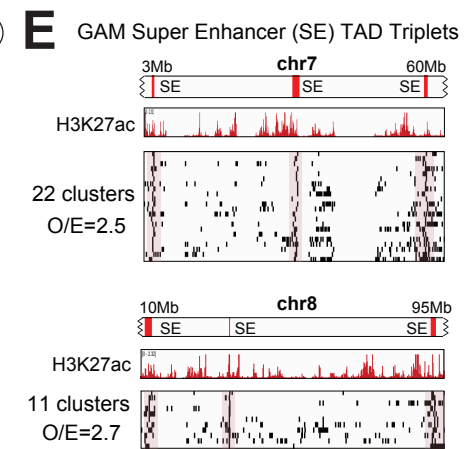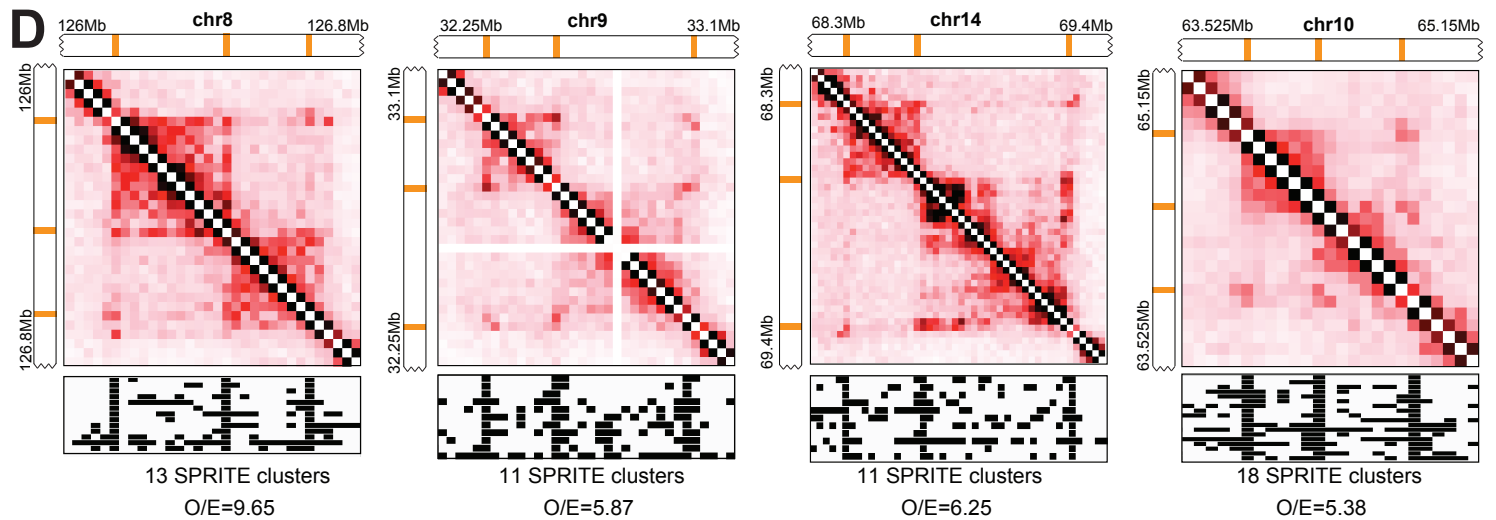

Supplement: NIHMS972930-supplement-2.pdf [file NIHMS972930-supplement-2.pdf]

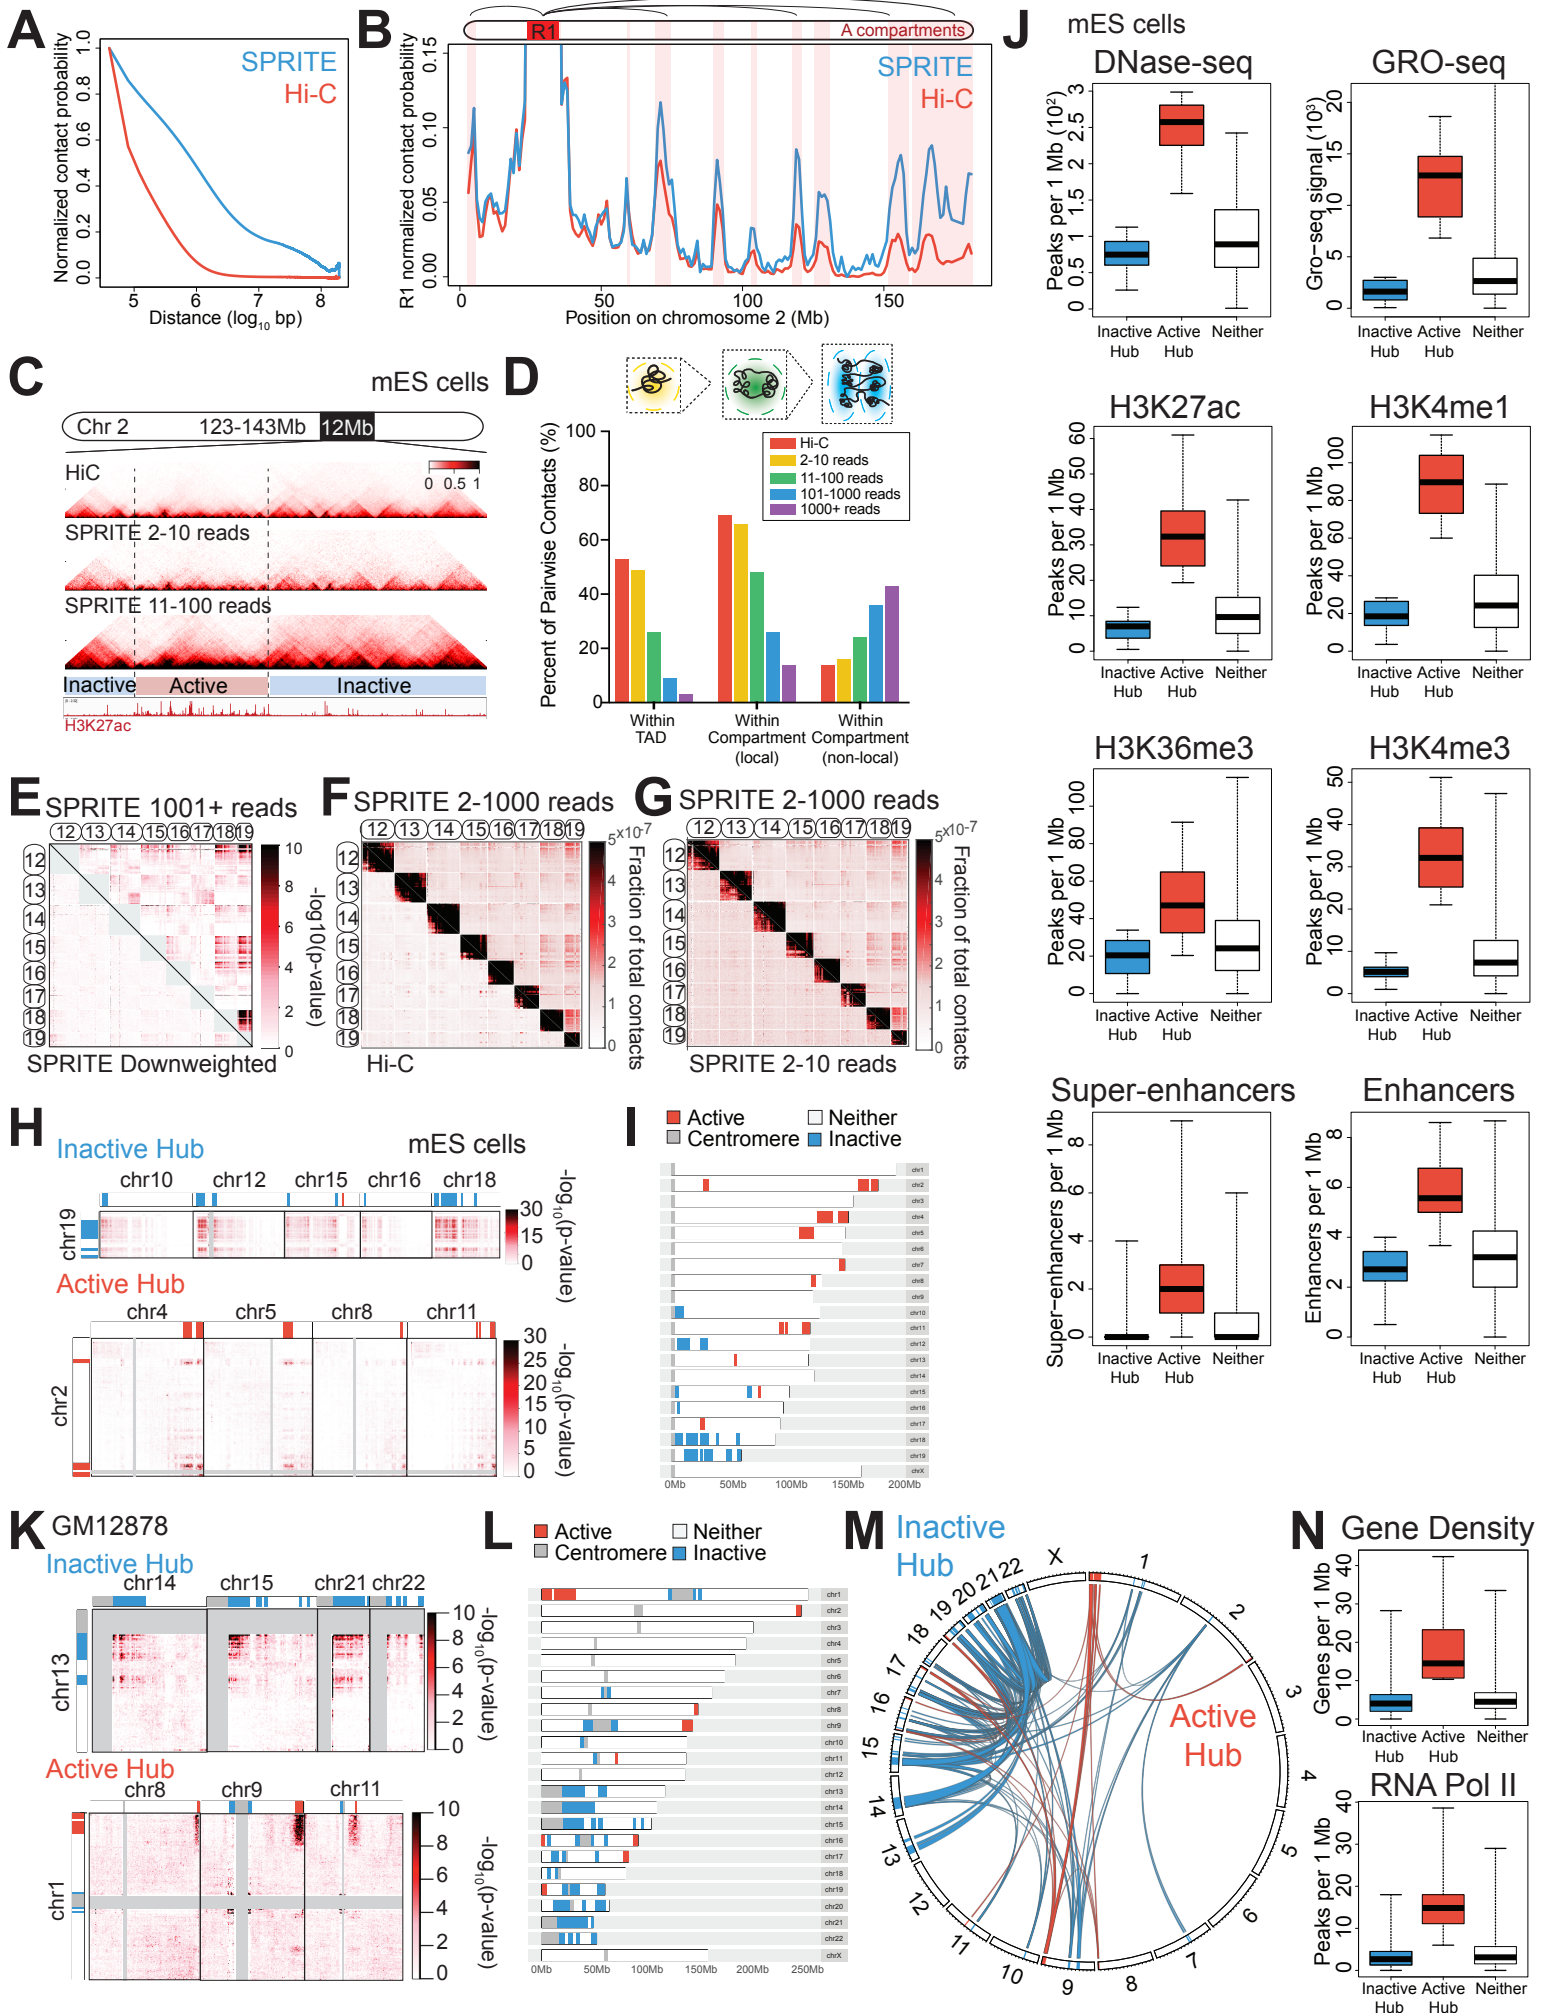

Supplement: NIHMS972930-supplement-3.pdf [file NIHMS972930-supplement-3.pdf]

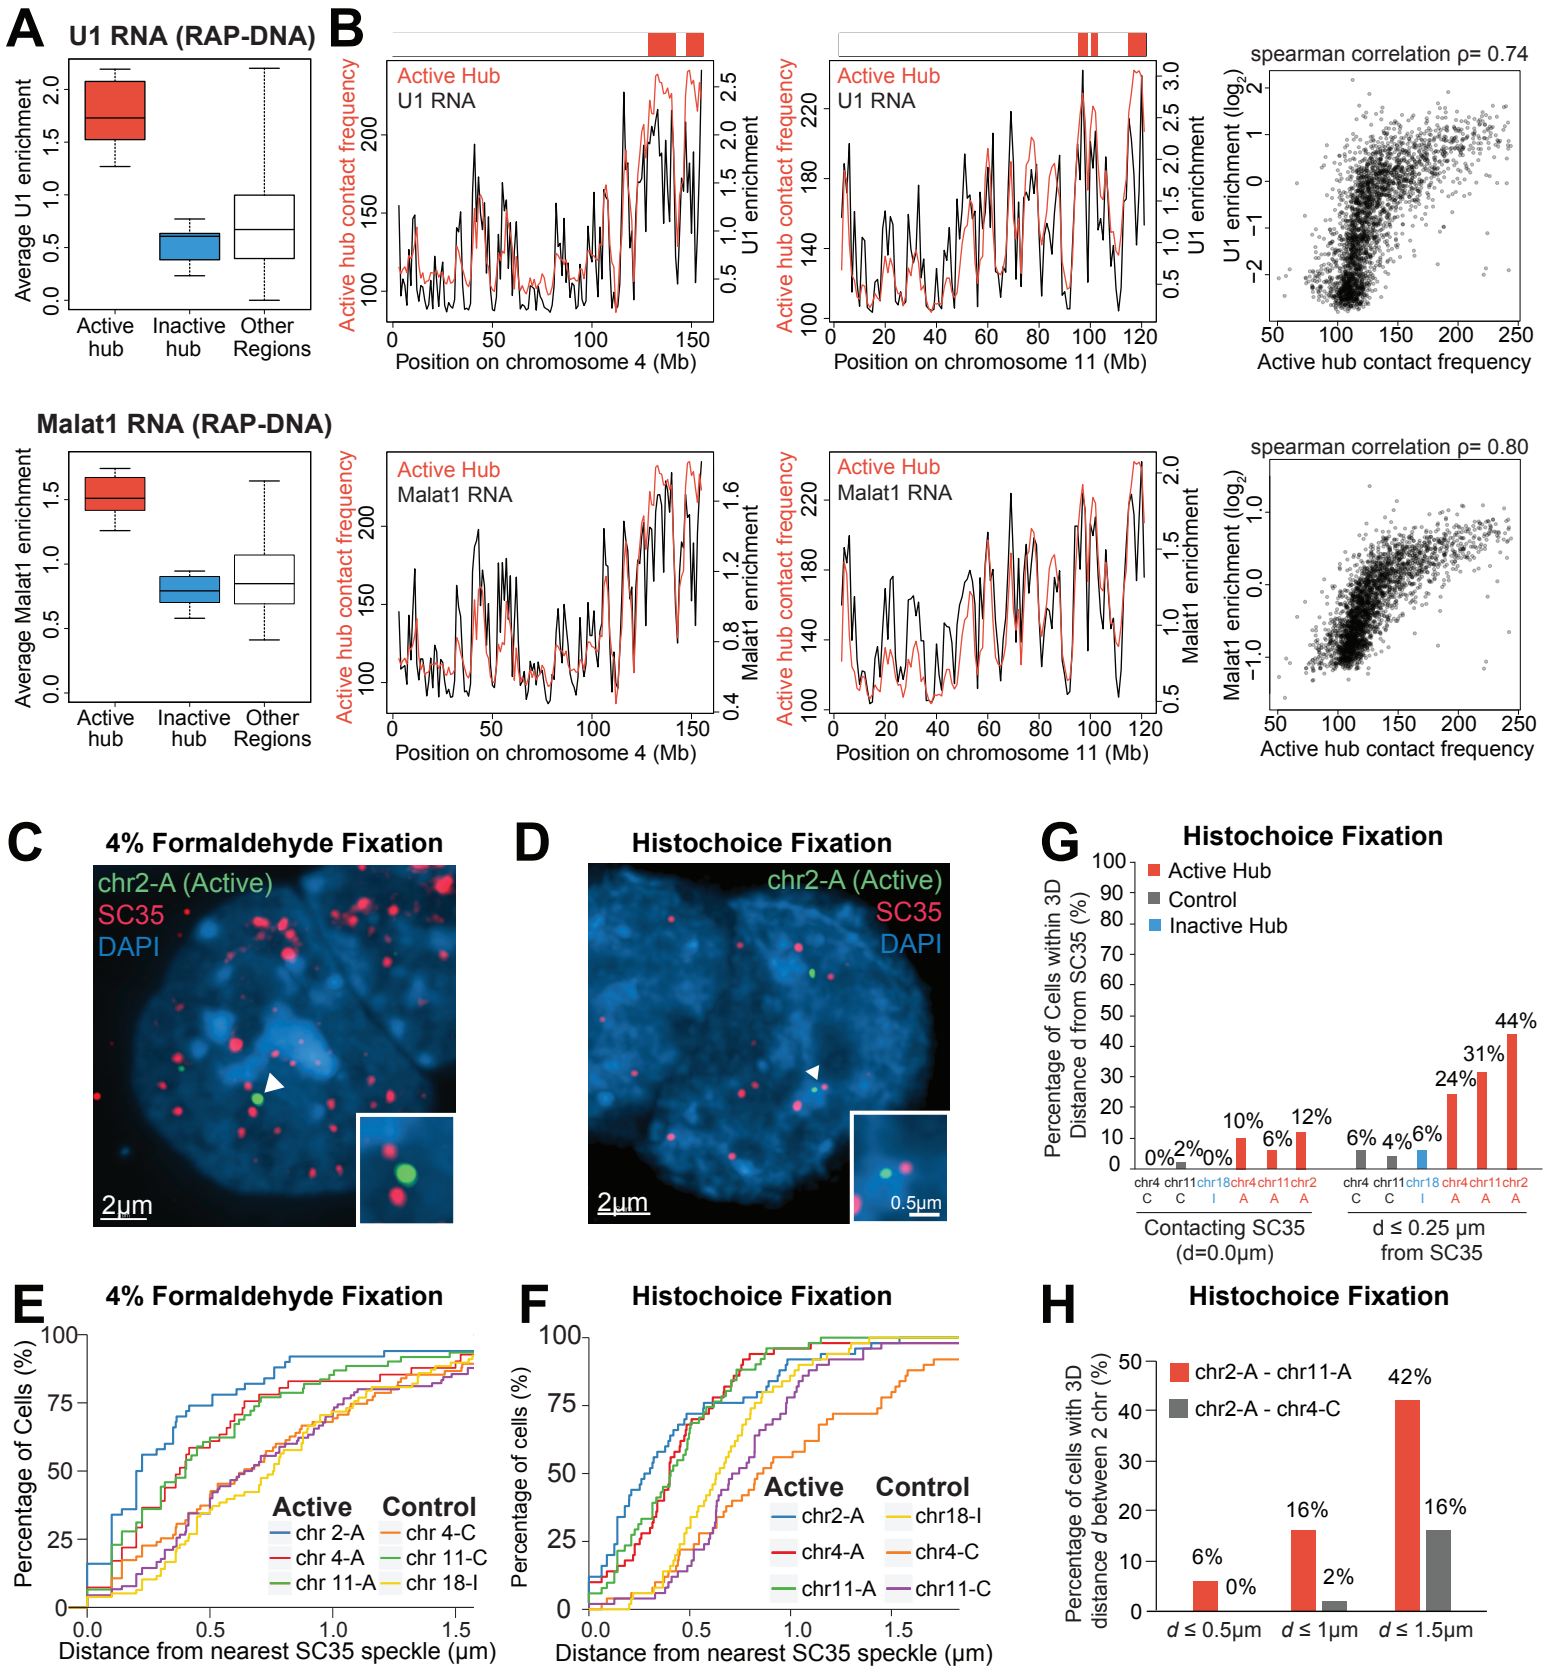

Supplement: NIHMS972930-supplement-5.pdf [file NIHMS972930-supplement-5.pdf]

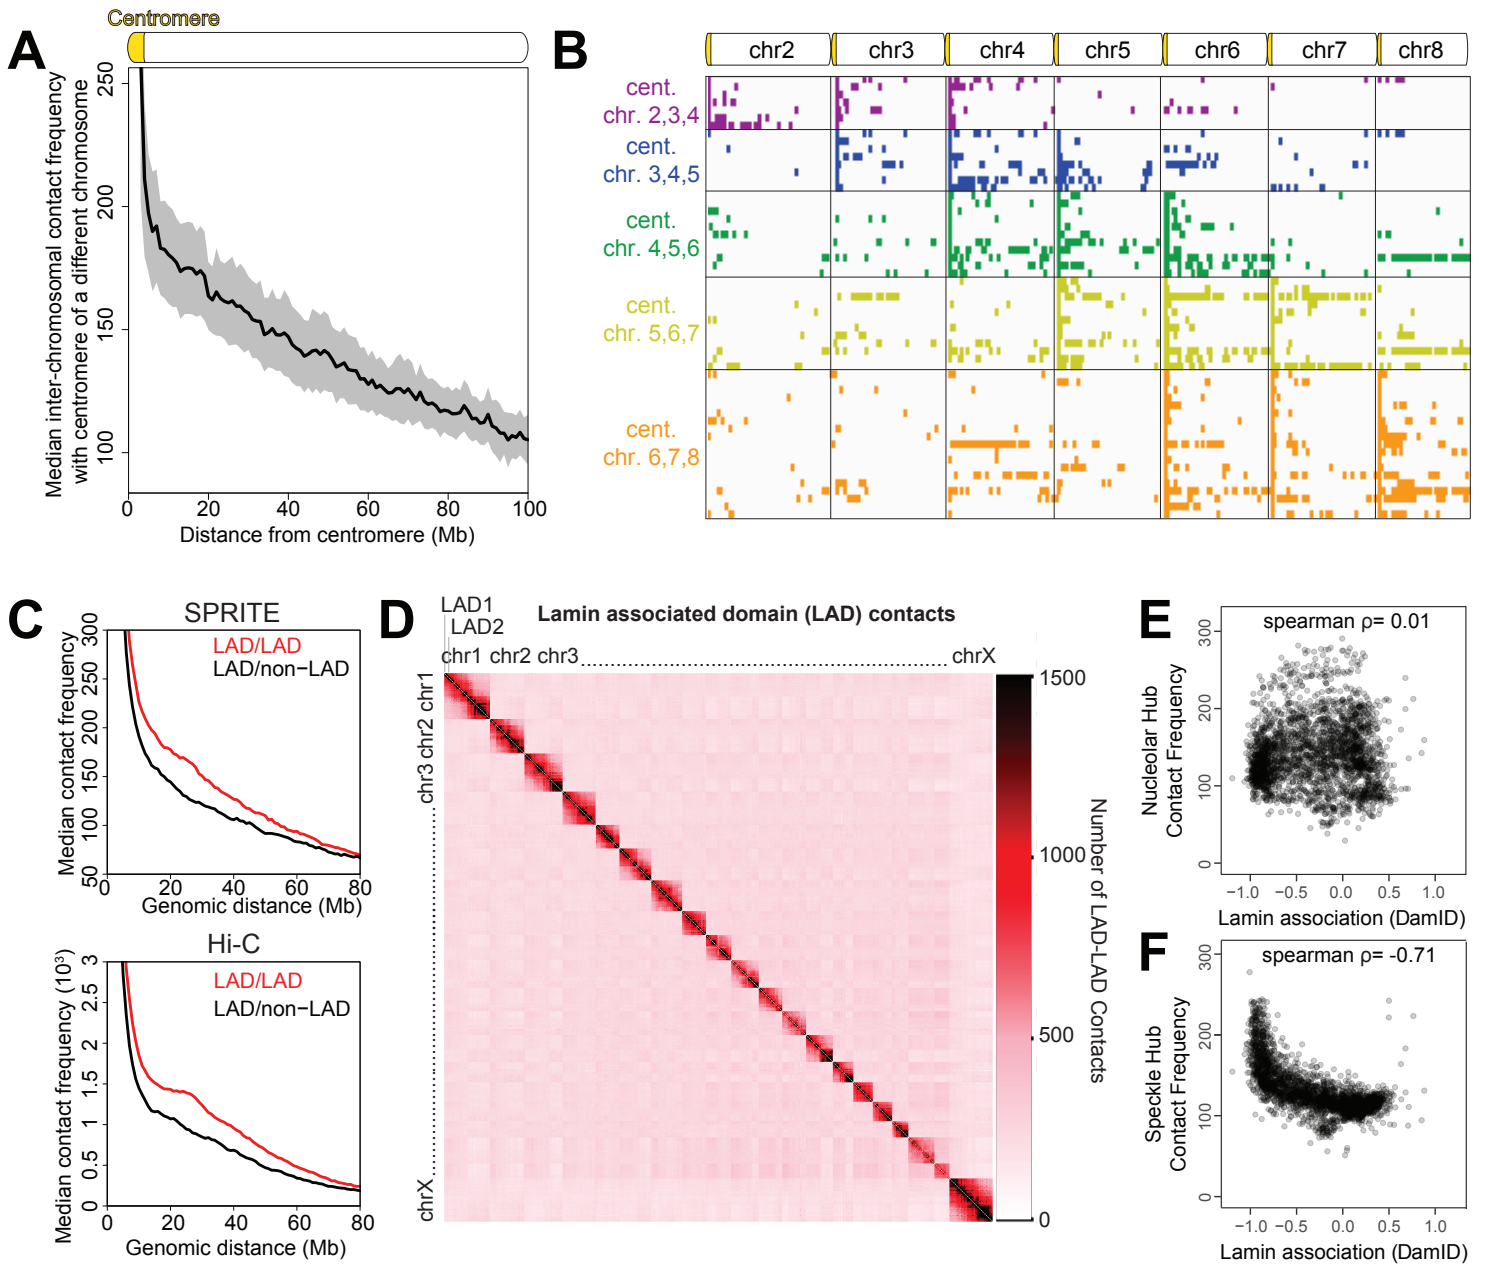

Supplement: NIHMS972930-supplement-7.pdf [file NIHMS972930-supplement-7.pdf]
